# Supplementary material for: Predominant structural configuration of natural antibody repertoires enables potent antibody responses against protein antigens
Source: PubMed Central journal article supplement (PMC5378893; doi:10.1038/srep12411), 2015-07-23
Supplement: srep12411-s1.pdf [file srep12411-s1.pdf]

# Supplemental Information

## **Predominant structural configuration of natural antibody repertoires enables potent antibody responses against protein antigens**

Hong-Sen Chen<sup>a,e</sup>, Shin-Chen Hou<sup>a,e</sup>, Jhih-Wei Jian<sup>a,b,c</sup>, King-Siang Goh<sup>a</sup>, San-Tai Shen<sup>a</sup>, Yu-Ching Lee<sup>a</sup>, Jhong-Jhe You<sup>a</sup>, Hung-Pin Peng<sup>a</sup>, Wen-Chih Kuo<sup>d</sup>, Shui-Tsung Chen<sup>d</sup>, Ming-Chi Peng<sup>d</sup>, Hwei-Jiung Wang<sup>d</sup>, Chung-Ming Yu<sup>a</sup>, Ing-Chien Chen<sup>a</sup>, Chao-Ping Tung<sup>a</sup>, Tzu-Han Chen<sup>a</sup>, Kuo Ping Chiu<sup>a</sup>, Che Ma<sup>a</sup>, Chih Yuan Wu<sup>a</sup>, Sheng-Wei Lin<sup>d</sup>, An-Suei Yang<sup>a,\*</sup>

<sup>a</sup> Genomics Research Center, Academia Sinica, Taipei, Taiwan 115.

<sup>b</sup> Institute of Biomedical Informatics, National Yang-Ming University, Taipei, Taiwan 112.

<sup>c</sup> Bioinformatics Program, Taiwan International Graduate Program, Institute of Information Science, Academia Sinica, Taipei, Taiwan 115.

<sup>d</sup> Institute of Biological Chemistry, Academia Sinica, Taipei, Taiwan 115.

<sup>e</sup> These authors contribute equally.

\* Correspondence should be addressed to: An-Suei Yang, Genomics Research Center, Academia Sinica, 128 Academia Rd., Sec.2, Nankang Dist., Taipei, Taiwan 115.

Phone: +8862-2-2787-1232 email: [yangas@gate.sinica.edu.tw](mailto:yangas@gate.sinica.edu.tw)

**Running title:** structural repertoire determines antibody response

**Keywords:** antibody repertoire, phage display, synthetic antibody library, next generation sequencing, antibody bioinformatics

## **Inventory of Supplemental Information**

### **Supplemental Figures**

**Supplementary Figure S1. Related to Figure 1a. Immunization procedure of mouse m0, m3, m4, and m6.**

**Supplementary Figure S2. Related to Figure 1b~d. Germline gene segment usage distributions of mouse antibody repertoires.**

**Supplementary Figure S3. Related to Figure 2. Comparison of CDR sequence profiles for heavy chain variable domains from S316 antibodies and NGS of antibody repertoires.**

**Supplementary Figure S4. Related to Figure 4. Template scFv sequences for GH2 scFv library construction.**

**Supplementary Figure S5. Related to Figure 5c. SDS-PAGE analysis of purified 29 GH2 and 6 mouse anti-HER2/ECD IgGs under reducing condition.**

### **Supplemental Tables**

**Supplementary Table S1. Related to Figure 1b~d. Summary of data sets of NGS reads from m0, m3, m4, m6 mouse antibody repertoires.**

**Supplementary Table S2. Related to Figure 3. The amino acid type distributions of the GH2 antibody library**

**Supplementary Table S3. Related to Figure 4. Primers for diversifying of CDRs in GH2 antibody library.**

**Supplementary Table S4. Related to Figure 5c. Summary of the expression and characterization GH2 and mouse IgGs: epitope group, expression yield, EC<sub>50</sub>, and BIAcore measurement of binding kinetics and affinity.**

**Supplementary Table S5. Related to Figure 5c. Summary of the CDR sequences of GH2 and mouse IgGs.**

**Supplementary Table S6. Related to Results. Summary of antibody discoveries of GH2 scFvs binding specifically to the protein antigens listed in the first column.**

### **Supplemental Experimental Procedures**

**Mouse immunization**

**NGS of phage-displayed antibody libraries**

**Computational analysis of the NGS data**

**Competition of antibody-HER2/ECD interaction**

**Antibody-antigen interaction affinity and kinetics measurements by surface plasmon resonance**

**Epitope mapping with hydrogen-deuterium exchange measured with LC-tandem mass spectroscopy (HDX-MS)**

**EC<sub>50</sub> for antibody-antigen interactions**

**Transient expression of IgG with HEK293-F cells**

**Cell line and reagents**

**Immunofluorescence microscopy**

**Western blotting**

### **Supplemental References**

|           | First Immunization | Second boost | Sacrificed Time                                |
|-----------|--------------------|--------------|------------------------------------------------|
| <b>m0</b> | None               | None         | At the age of 16 weeks                         |
| <b>m3</b> | MBP-#3             | HER2/ECD     | 5 <sup>th</sup> weeks from second boost        |
| <b>m4</b> | MBP-#3             | HER2/ECD     | 12 <sup>th</sup> weeks from second boost       |
| <b>m6</b> | HER2/ECD           | None         | 14 <sup>th</sup> weeks from first immunization |

**Supplementary Figure S1. Related to Figure 1a.** Immunization procedure of mouse m0, m3, m4, and m6. m0 was a control mouse which had not been exposed to any immunogen. m3, m4, and m6 was raised free of infection for 8~12 weeks before injection of first immunogen. m3 was first immunized with MBP-#3 (mannose binding protein fused with polypeptide fragment from residues 203-262 of HER2/ECD), followed by a second immunization with HER2/ECD 4 weeks after the first immunization. m4 was first immunized with MBP-#3, followed by a second HER2/ECD immunization 4 weeks after the first immunization. m6 was immunized by HER2/ECD only. Serum titer against HER2/ECD of these mice was monitored by Western blotting and ELISA after immunization. Immunized mice were sacrificed for spleen harvesting at the time of serum titer staying the stationary phase (hyper-immunization response). Titer of m6 achieved to the stationary state without second boost 11 weeks after first immunization and maintained for 2 other weeks till sacrificed.

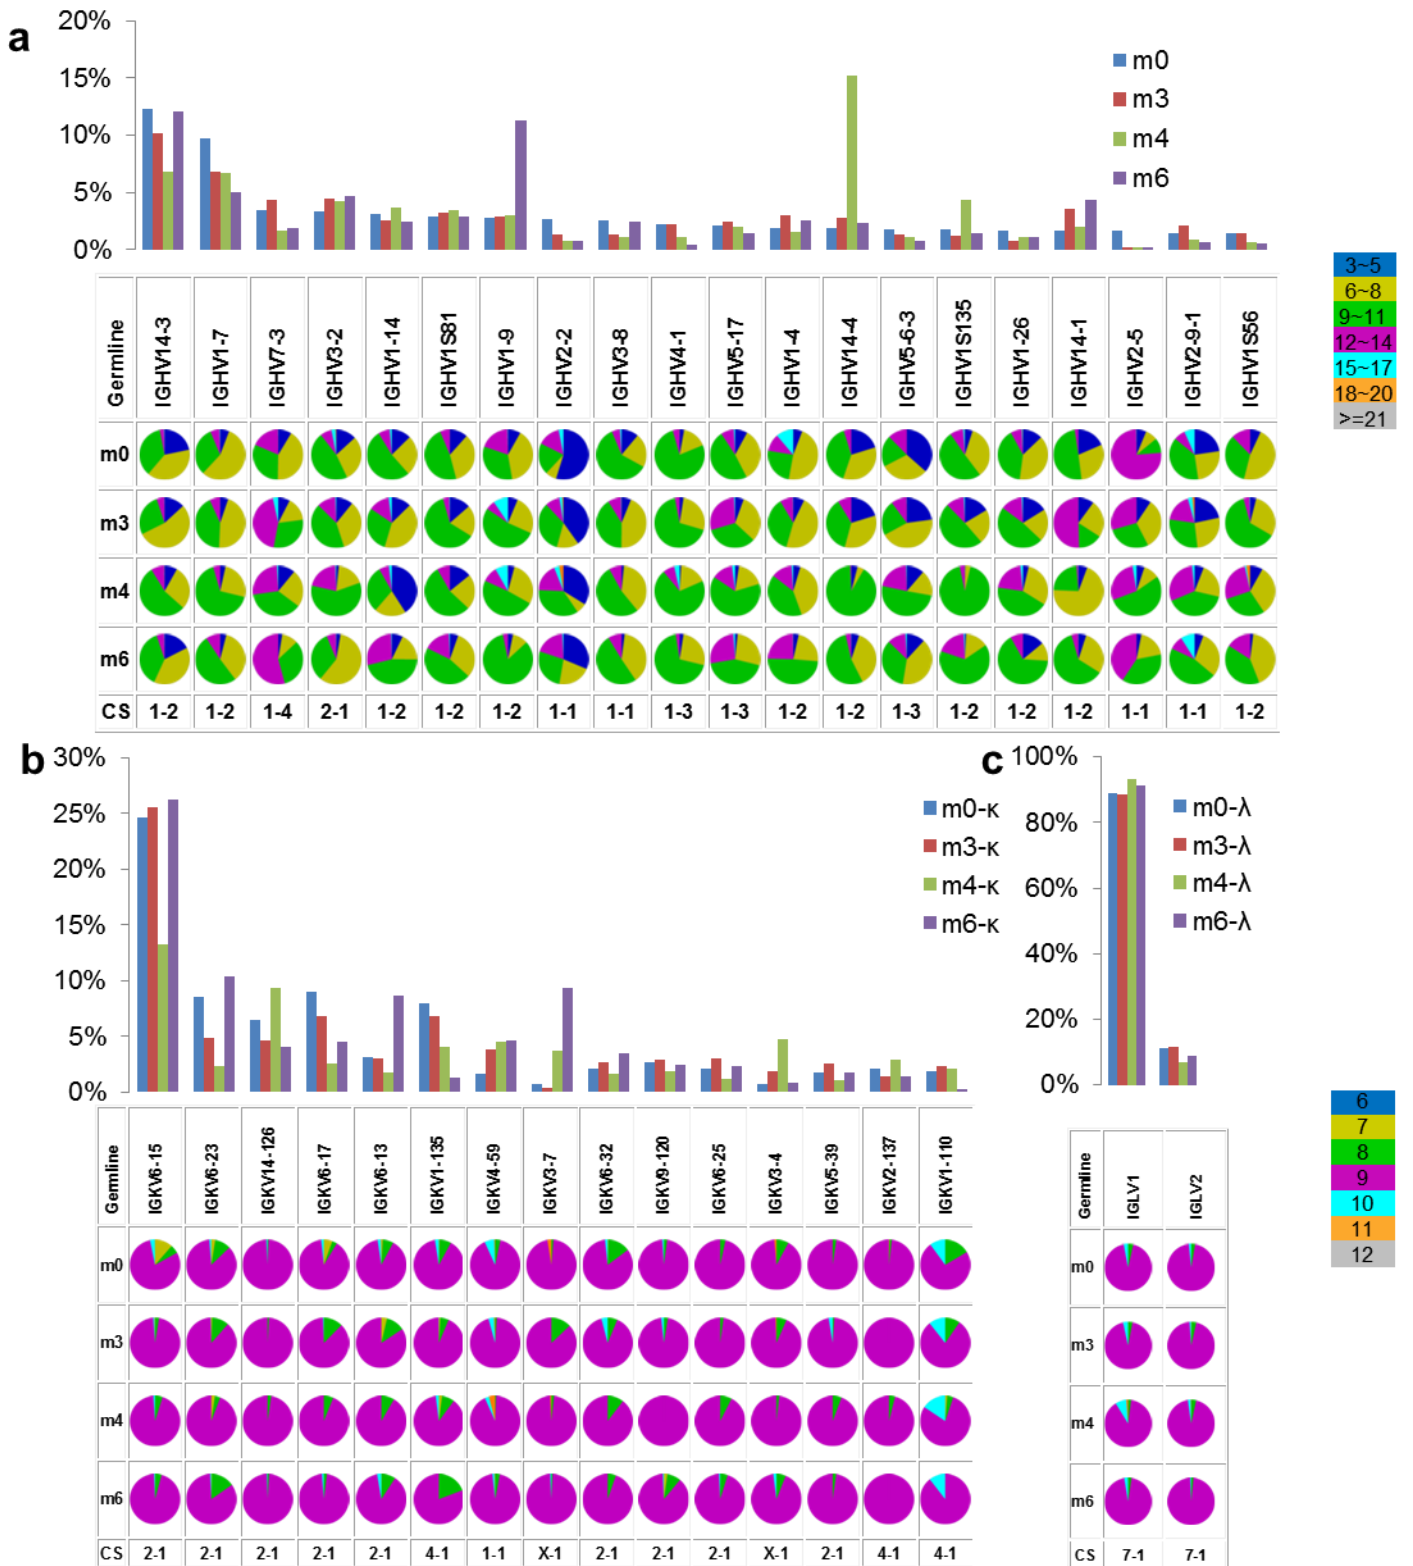

**Supplementary Figure S2. Related to Figure 1b~d.** Germline gene segment usage distributions of mouse antibody repertoires. (a) Antibody heavy chain variable domain germline gene ( $V_H$ ) fragment usage distributions in mouse antibody

repertoires, for which the immunization histories are shown in Supplementary Figure S1. The histograms show the percentage distributions of the major  $V_H$  segments accounting for 59% of all  $V_H$  in the repertoire; the names of these major  $V_H$  gene segments are shown in the first row of the Table below the histograms. The distributions of the CDR-H3 lengths are shown as the pie charts, where the color codes are displayed next to the Table. The canonical structure types for [CDR-H1]-[CDR-H2] for each of the  $V_H$  gene segments are shown in the last row of the Table. The canonical structure (CS) assignments follows the definition of Chothia <sup>1</sup>, and were determined with the computational tool accessible through the abYsis web server <http://www.bioinf.org.uk/abysis/> from Dr. Andrew Martin's group. (b) Antibody  $\kappa$ -light chain variable domain germline gene ( $V_\kappa$ ) fragment usage distributions in mouse antibody repertoires, for which the immunization histories are shown in Supplementary Figure S1. The histograms show the percentage distributions of the major  $V_\kappa$  segments accounting for 60% of all  $V_\kappa$  in the repertoire; the names of these major  $V_\kappa$  gene segments are shown in the first row of the Table below the histograms. The distributions of the CDR-L3 lengths are shown as the pie charts, where the color codes are displayed next to the Table. The canonical structure types for [CDR-L1]-[CDR-L2] for each of the  $V_\kappa$  gene segments are shown in the last row of the Table. (c) Antibody  $\lambda$ -light chain variable domain germline gene ( $V_\lambda$ ) fragment usage distributions in mouse antibody repertoires, for which the immunization histories are shown in Supplementary Figure S1. The histograms show the percentage distributions of the major  $V_\lambda$  segments accounting for almost all  $V_\lambda$  in the repertoire; the names of the major  $V_\lambda$  gene segments are shown in the first row of the Table below the histograms. The distributions of the CDR-L3 lengths are shown as the pie charts, where the color codes are displayed next to the Table. The canonical structure types for [CDR-L1]-[CDR-L2] for each of the  $V_\lambda$  gene segments are shown in the last row of the Table.

**a**

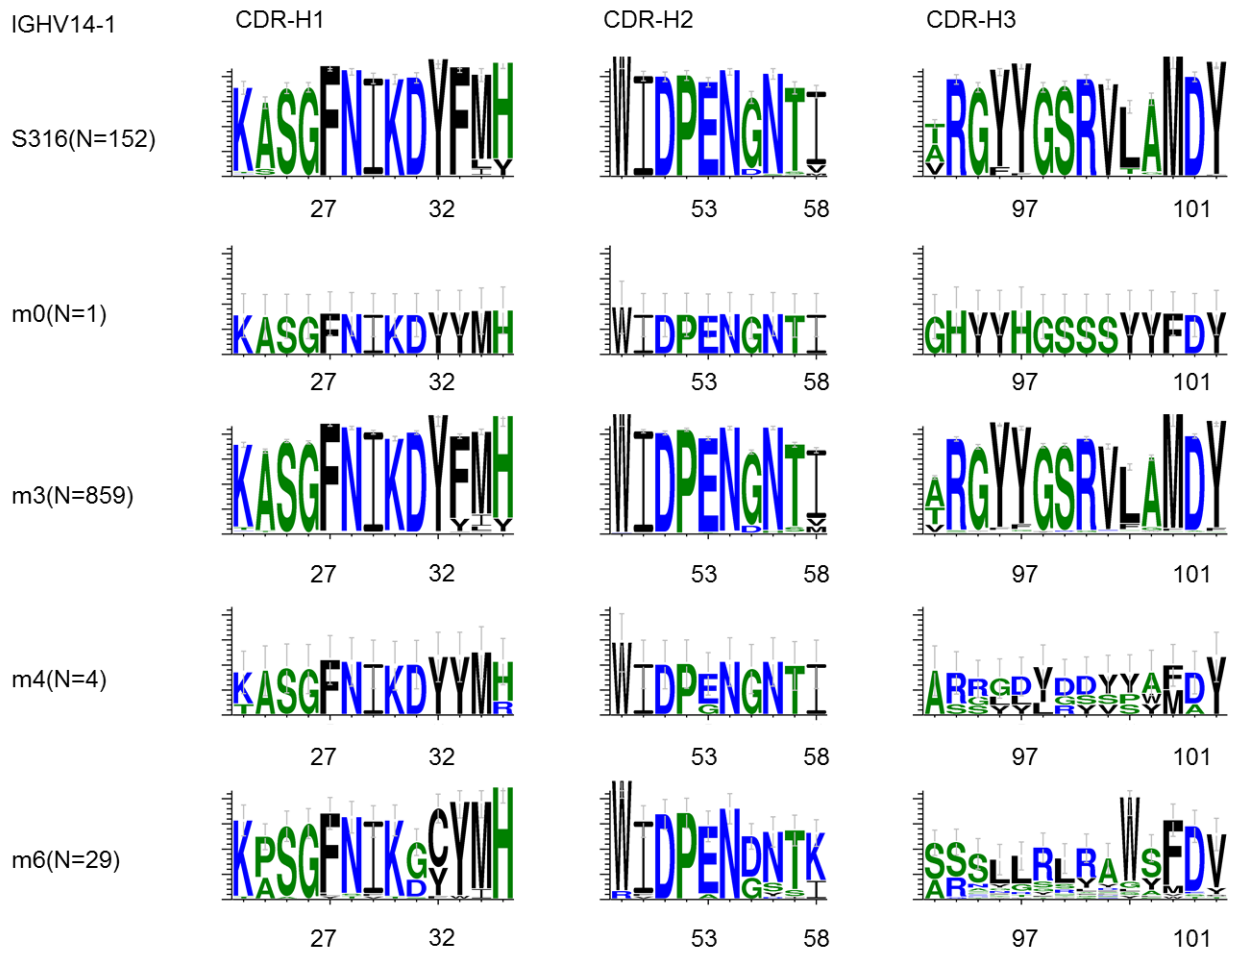

**b**

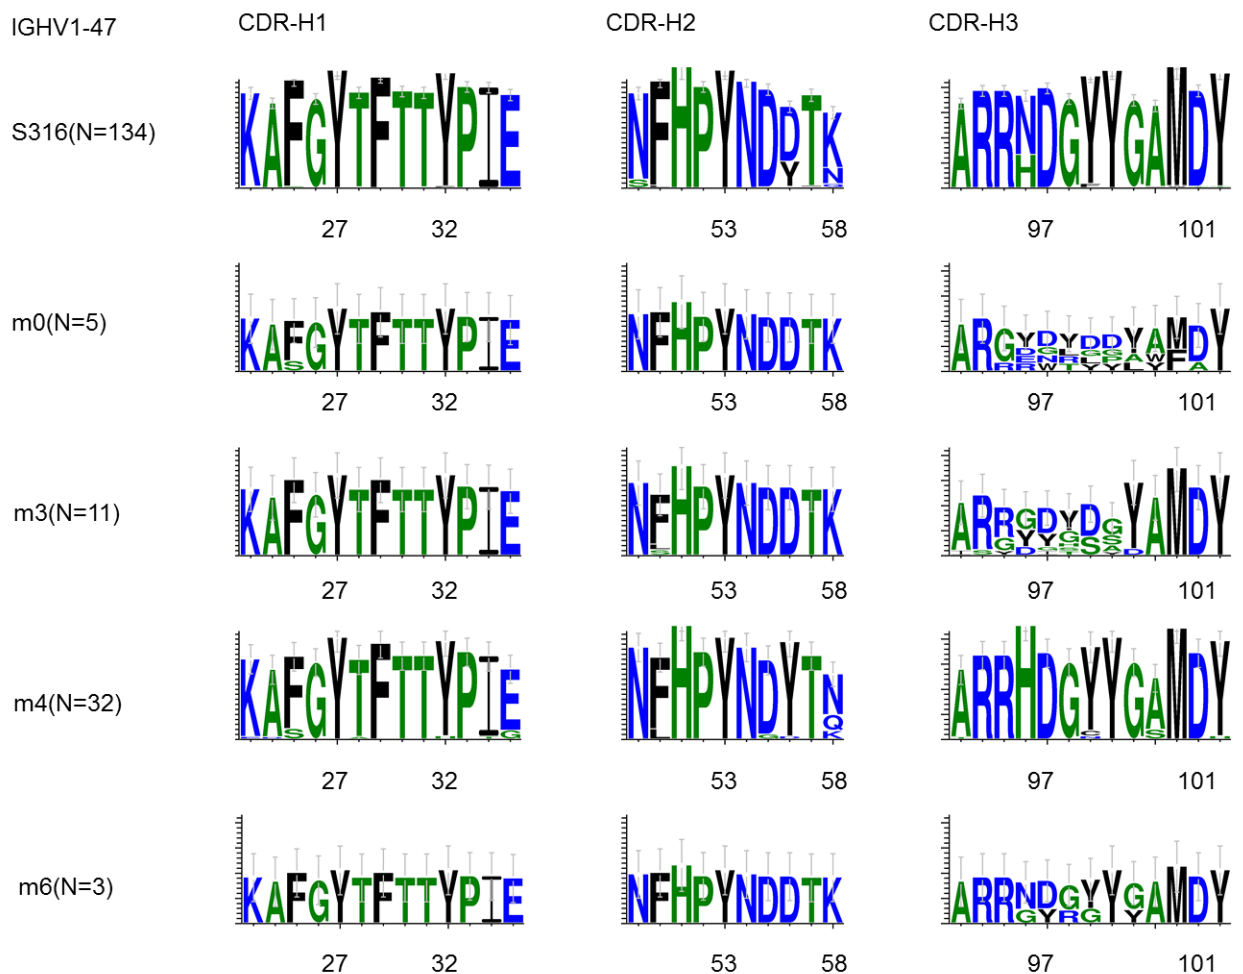

**Supplementary Figure S3. Related to Figure 2.** Comparison of CDR sequence profiles for heavy chain variable domains from S316 antibodies and NGS of antibody repertoires. (a) Antibody CDR-H1~H3 sequence LOGOs derived from S316 antibodies with germline sequence of IGHV14-1 are compared with corresponding sequence LOGOs derived from NGS of antibody repertoires from control naïve mouse m0 and immunized mice m3, m4, and m6 respectively. (b) Antibody CDR-H1~H3 sequence LOGOs derived from S316 antibodies with germline sequence of IGHV1-47 are compared with corresponding sequence LOGOs derived from NGS of antibody repertoires from control naïve mouse m0 and immunized mice m3, m4, and m6 respectively.





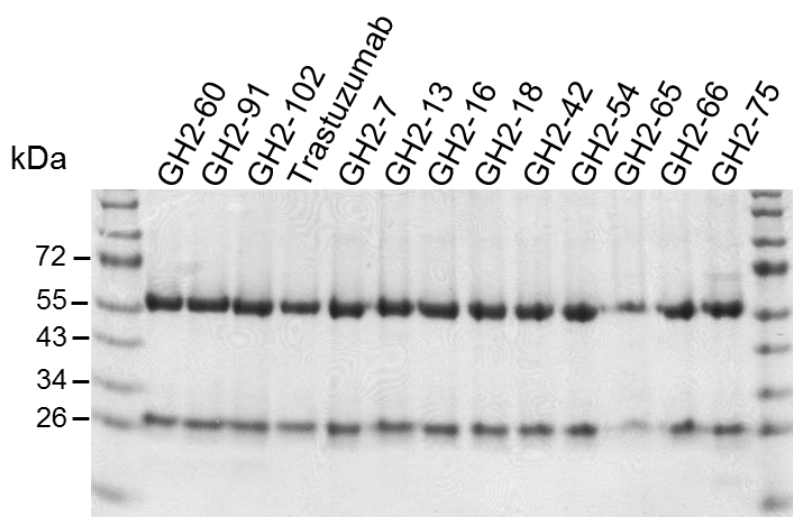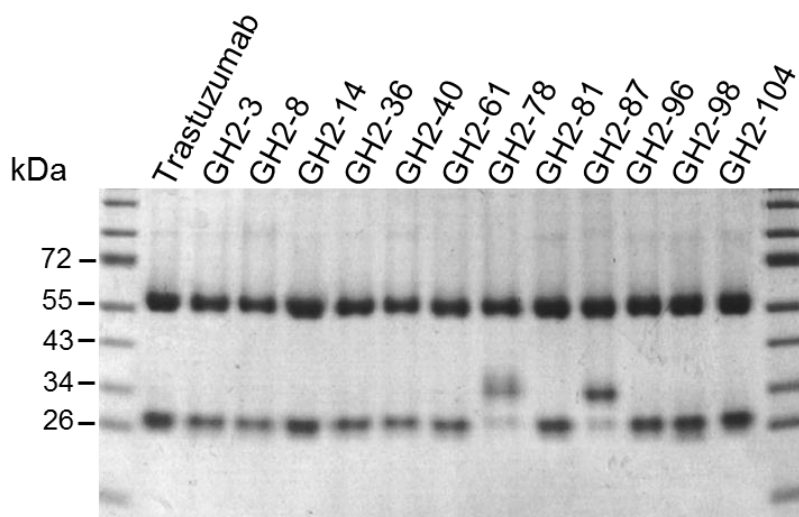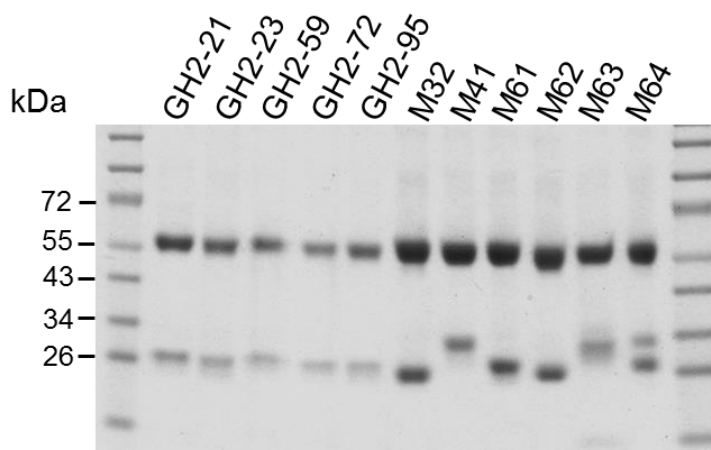

**Supplementary Figure S5. Related to Figure 5c.** SDS-PAGE analysis of purified 29 GH2 and 6 mouse anti-HER2/ECD IgGs under reducing condition. Equal amount of purified IgGs were analyzed by the SDS-PAGE. GH2-78 and -87 are glycosylated in

the CDR-L1.

**Supplementary Table S1. Related to Figure 1b-d.** Summary of data sets of NGS reads from m0, m3, m4, m6 mouse antibody repertoires.

| Mouse data                                             | Segment          | m0           | m3          | m4          | m6          |
|--------------------------------------------------------|------------------|--------------|-------------|-------------|-------------|
| Sequence read <sup>1</sup>                             | VH               | 37302        | 57322       | 22463       | 21400       |
|                                                        | VL               | 22032        | 29481       | 21193       | 22454       |
| Canonical type assignment <sup>2</sup>                 | VH               | 29908        | 48267       | 18327       | 17641       |
|                                                        | VL               | 17965        | 22699       | 17445       | 18188       |
| Major VH and V $\kappa$ segments <sup>3</sup>          | VH               | 18610        | 28340       | 11355       | 10416       |
|                                                        | V $\kappa$       | 8100         | 5500        | 1917        | 4449        |
| Same CDR length as canonical type 1-2/2-1 <sup>4</sup> | VH (1-2)         | 12060        | 18494       | 8847        | 8054        |
|                                                        | V $\kappa$ (2-1) | 6403         | 4224        | 1197        | 3460        |
| Sequence showing diverse CDR <sup>5</sup>              | VH (1-2)         | 8574         | 12474       | 7585        | 6212        |
|                                                        | V $\kappa$ (2-1) | 3673         | 2662        | 659         | 2026        |
| Average amino acid differences in CDR <sup>6</sup>     | CDR-H1           | 1.52(0.79)   | 1.51(0.72)  | 1.55(0.73)  | 1.73(0.76)  |
|                                                        | CDR-H2           | 1.33(0.81)   | 1.79(1.16)  | 1.28(0.71)  | 1.50(0.85)  |
|                                                        | CDR-L1           | 1.51(1.13)   | 1.62(1.11)  | 1.32(0.88)  | 1.50(1.10)  |
|                                                        | CDR-L2           | 0.31(0.69)   | 0.40(0.75)  | 0.43(0.73)  | 0.44(0.77)  |
| Canonical type 1-2/2-1 validated <sup>7</sup>          | VH (1-2)         | 12020(99.7%) | 18314(99%)  | 8790(99.4%) | 7999(99.3%) |
|                                                        | V $\kappa$ (2-1) | 6369(99.5%)  | 4189(99.2%) | 1192(99.6%) | 3431(99.2%) |

1. Total NGS non-redundant reads for heavy chain (VH) and light chain (VL) variable domains.

2. Complete non-redundant sequence reads suitable for canonical structure type assignment for all CDRs.
3. Number of non-redundant sequence reads for the major germline sequence segment assignments shown in Supplementary Figure S2.
4. Number of non-redundant sequence reads that have the same corresponding CDR length as in the main canonical structure type combination 1-2-2-1 for CDR-H1, H2, L1, L2.
5. Number of non-redundant sequence reads that have the same corresponding CDR length as in the main canonical structure type combination 1-2-2-1 for CDR-H1, H2, L1, L2 but the CDR sequences are different from the germline sequences.
6. For those CDR sequences that deviate from the germline sequences, the average amino acid changes from the germline sequence are shown with the standard deviation shown in the parenthesis.
7. Number of non-redundant sequence reads that are confirmed to have the main canonical structure type combination 1-2-2-1 for CDR-H1, H2, L1, L2 with abYsis web server. The parenthesis shows the percentage of the number in this line over the number in 4<sup>th</sup> line of this Table.

**Supplementary Table S2. Related to Figure 3.** The amino acid type distributions of the GH2 antibody library. Kabat number of each position is showing in column 2. Frequency of each type of amino acids is showing in column 3-18. Blank indicates zero frequency

|        | Kabat Number | F    | W    | Y    | G    | S    | D    | N    | A    | L    | I    | V    | M    | P    | T    | H    | R    |
|--------|--------------|------|------|------|------|------|------|------|------|------|------|------|------|------|------|------|------|
| CDR-L1 | 30           | 0.17 | 0.17 | 0.17 | 0.21 | 0.21 | 0.04 | 0.04 |      |      |      |      |      |      |      |      |      |
|        | 31           | 0.17 | 0.17 | 0.17 | 0.21 | 0.21 | 0.04 | 0.04 |      |      |      |      |      |      |      |      |      |
|        | 32           | 0.17 | 0.17 | 0.17 | 0.21 | 0.21 | 0.04 | 0.04 |      |      |      |      |      |      |      |      |      |
| CDR-L2 | 49           | 0.33 |      | 0.33 |      | 0.33 |      |      |      |      |      |      |      |      |      |      |      |
|        | 50           | 0.20 | 0.20 | 0.20 | 0.20 | 0.20 |      |      |      |      |      |      |      |      |      |      |      |
|        | 51           |      |      |      |      | 0.25 |      |      | 0.25 |      |      |      |      | 0.25 | 0.25 |      |      |
|        | 52           |      |      |      | 0.17 | 0.17 |      |      | 0.17 |      |      |      |      | 0.17 | 0.17 |      | 0.17 |
|        | 53           | 0.20 | 0.20 | 0.20 | 0.20 | 0.20 |      |      |      |      |      |      |      |      |      |      |      |
| CDR-L3 | 91           | 0.20 | 0.20 | 0.20 | 0.20 | 0.20 |      |      |      |      |      |      |      |      |      |      |      |
|        | 92           | 0.20 | 0.20 | 0.20 | 0.20 | 0.20 |      |      |      |      |      |      |      |      |      |      |      |
|        | 93           |      |      |      | 0.25 | 0.25 | 0.25 | 0.25 |      |      |      |      |      |      |      |      |      |
|        | 94           | 0.20 | 0.20 | 0.20 | 0.20 | 0.20 |      |      |      |      |      |      |      |      |      |      |      |
|        | 96           | 0.13 |      |      |      |      |      |      |      | 0.38 | 0.19 | 0.25 | 0.06 |      |      |      |      |
| CDR-H1 | 30           |      |      |      | 0.25 | 0.25 | 0.25 | 0.25 |      |      |      |      |      |      |      |      |      |
|        | 31           |      |      |      | 0.25 | 0.25 | 0.25 | 0.25 |      |      |      |      |      |      |      |      |      |
|        | 32           | 0.20 | 0.20 | 0.20 | 0.20 | 0.20 |      |      |      |      |      |      |      |      |      |      |      |
|        | 33           | 0.20 | 0.20 | 0.20 | 0.20 | 0.20 |      |      |      |      |      |      |      |      |      |      |      |
| CDR-H2 | 50           | 0.20 | 0.20 | 0.20 | 0.20 | 0.20 |      |      |      |      |      |      |      |      |      |      |      |
|        | 52           |      | 0.50 |      | 0.50 |      |      |      |      |      |      |      |      |      |      |      |      |
|        | 53           | 0.33 |      | 0.33 |      | 0.33 |      |      |      |      |      |      |      |      |      |      |      |
|        | 54           |      | 0.50 |      | 0.50 |      |      |      |      |      |      |      |      |      |      |      |      |
|        | 56           | 0.33 |      | 0.33 |      | 0.33 |      |      |      |      |      |      |      |      |      |      |      |
|        | 58           | 0.33 |      | 0.33 |      | 0.33 |      |      |      |      |      |      |      |      |      |      |      |
| CDR-H3 | 96           | 0.11 | 0.05 | 0.11 | 0.05 |      | 0.11 | 0.11 |      | 0.11 | 0.11 | 0.11 |      |      |      | 0.11 |      |
|        | 97           | 0.11 | 0.05 | 0.11 | 0.05 |      | 0.11 | 0.11 |      | 0.11 | 0.11 | 0.11 |      |      |      | 0.11 |      |
|        | 98           | 0.11 | 0.05 | 0.11 | 0.05 |      | 0.11 | 0.11 |      | 0.11 | 0.11 | 0.11 |      |      |      | 0.11 |      |
|        | 99           | 0.11 | 0.05 | 0.11 | 0.05 |      | 0.11 | 0.11 |      | 0.11 | 0.11 | 0.11 |      |      |      | 0.11 |      |
|        | 100          | 0.11 | 0.05 | 0.11 | 0.05 |      | 0.11 | 0.11 |      | 0.11 | 0.11 | 0.11 |      |      |      | 0.11 |      |
|        | 100A         | 0.11 | 0.05 | 0.11 | 0.05 |      | 0.11 | 0.11 |      | 0.11 | 0.11 | 0.11 |      |      |      | 0.11 |      |
|        | 100B         | 0.11 | 0.05 | 0.11 | 0.05 |      | 0.11 | 0.11 |      | 0.11 | 0.11 | 0.11 |      |      |      | 0.11 |      |

**Supplementary Table S3. Related to Figure 4.** Primers for diversifying CDRs in GH2 antibody library.

| Target CDRs | Primer                                                                       | Sequences <sup>1</sup>                                                                     | Mutagenized residues <sup>2</sup> |     |     |     |     |     |  |  |  |
|-------------|------------------------------------------------------------------------------|--------------------------------------------------------------------------------------------|-----------------------------------|-----|-----|-----|-----|-----|--|--|--|
| CDR-L1      |                                                                              | GACCATTACCTGCCGTGCGAGCCAGGATGTT <u>AGC ACG GCG</u> GTCGCATGGTATCAGCAGAAACCA                | S30                               | T31 | A32 |     |     |     |  |  |  |
|             | L101                                                                         | GACCATTACCTGCCGTGCGAGCCAGGATGTT THY THY THY GTCGCATGGTATCAGCAGAAACCA                       | b                                 | b   | b   |     |     |     |  |  |  |
|             | L102                                                                         | GACCATTACCTGCCGTGCGAGCCAGGATGTT THY THY KGG GTCGCATGGTATCAGCAGAAACCA                       | b                                 | b   | a   |     |     |     |  |  |  |
|             | L103                                                                         | GACCATTACCTGCCGTGCGAGCCAGGATGTT THY KGG KGG GTCGCATGGTATCAGCAGAAACCA                       | b                                 | a   | a   |     |     |     |  |  |  |
|             | L104                                                                         | GACCATTACCTGCCGTGCGAGCCAGGATGTT THY KGG THY GTCGCATGGTATCAGCAGAAACCA                       | b                                 | a   | b   |     |     |     |  |  |  |
|             | L105                                                                         | GACCATTACCTGCCGTGCGAGCCAGGATGTT KGG THY THY GTCGCATGGTATCAGCAGAAACCA                       | a                                 | b   | b   |     |     |     |  |  |  |
|             | L106                                                                         | GACCATTACCTGCCGTGCGAGCCAGGATGTT KGG THY KGG GTCGCATGGTATCAGCAGAAACCA                       | a                                 | b   | a   |     |     |     |  |  |  |
|             | L107                                                                         | GACCATTACCTGCCGTGCGAGCCAGGATGTT KGG KGG KGG GTCGCATGGTATCAGCAGAAACCA                       | a                                 | a   | a   |     |     |     |  |  |  |
|             | L108                                                                         | GACCATTACCTGCCGTGCGAGCCAGGATGTT KGG KGG THY GTCGCATGGTATCAGCAGAAACCA                       | a                                 | a   | b   |     |     |     |  |  |  |
| L109        | GACCATTACCTGCCGTGCGAGCCAGGATGTT RRY RRY RRY GTCGCATGGTATCAGCAGAAACCA         | d                                                                                          | d                                 | d   |     |     |     |     |  |  |  |
| CDR-L2      |                                                                              | GGCAAAGCGCCGAAACTTCTGATA <u>TAC TCT GCG TCC TTC</u> CTGTATAGCGGCGTGCCGTCGCGTTTTTCG         | Y49                               | S50 | A51 | S52 | F53 |     |  |  |  |
|             | L201                                                                         | GGCAAAGCGCCGAAACTTCTGATA THY THY NCN VSY THY CTGTATAGCGGCGTGCCGTCGCGTTTTTCG                | b                                 | b   | p   | e   | b   |     |  |  |  |
|             | L202                                                                         | GGCAAAGCGCCGAAACTTCTGATA THY THY NCN VSY KGG CTGTATAGCGGCGTGCCGTCGCGTTTTTCG                | b                                 | b   | p   | e   | a   |     |  |  |  |
|             | L203                                                                         | GGCAAAGCGCCGAAACTTCTGATA THY KGG NCN VSY KGG CTGTATAGCGGCGTGCCGTCGCGTTTTTCG                | b                                 | a   | p   | e   | a   |     |  |  |  |
| L204        | GGCAAAGCGCCGAAACTTCTGATA THY KGG NCN VSY KGG CTGTATAGCGGCGTGCCGTCGCGTTTTTCG  | b                                                                                          | b                                 | p   | e   | b   |     |     |  |  |  |
| CDR-L3      |                                                                              | GATTTTGCACCTACTACTGTCAACAG <u>CAT TAT ACC ACA</u> CCG <u>CCG</u> ACCTTCGGTCAAGGCACCAAAGTGG | H91                               | Y92 | T93 | T94 | P95 | P96 |  |  |  |
|             | L301                                                                         | GATTTTGCACCTACTACTGTCAACAG THY THY RRY THY CCG NTN ACCTTCGGTCAAGGCACCAAAGTGG               | b                                 | b   | d   | b   | P   | z   |  |  |  |
|             | L302                                                                         | GATTTTGCACCTACTACTGTCAACAG THY THY RRY KGG CCG NTN ACCTTCGGTCAAGGCACCAAAGTGG               | b                                 | b   | d   | a   | P   | z   |  |  |  |
|             | L303                                                                         | GATTTTGCACCTACTACTGTCAACAG THY KGG RRY KGG CCG NTN ACCTTCGGTCAAGGCACCAAAGTGG               | b                                 | a   | d   | a   | P   | z   |  |  |  |
|             | L304                                                                         | GATTTTGCACCTACTACTGTCAACAG THY KGG RRY THY CCG NTN ACCTTCGGTCAAGGCACCAAAGTGG               | b                                 | a   | d   | b   | P   | z   |  |  |  |
|             | L305                                                                         | GATTTTGCACCTACTACTGTCAACAG KGG THY RRY THY CCG NTN ACCTTCGGTCAAGGCACCAAAGTGG               | a                                 | b   | d   | b   | P   | z   |  |  |  |
|             | L306                                                                         | GATTTTGCACCTACTACTGTCAACAG KGG THY RRY KGG CCG NTN ACCTTCGGTCAAGGCACCAAAGTGG               | a                                 | b   | d   | a   | P   | z   |  |  |  |
|             | L307                                                                         | GATTTTGCACCTACTACTGTCAACAG KGG KGG RRY KGG CCG NTN ACCTTCGGTCAAGGCACCAAAGTGG               | a                                 | a   | d   | a   | P   | z   |  |  |  |
| L308        | GATTTTGCACCTACTACTGTCAACAG KGG KGG RRY THY CCG NTN ACCTTCGGTCAAGGCACCAAAGTGG | a                                                                                          | a                                 | d   | b   | P   | z   |     |  |  |  |
| CDR-H1      |                                                                              | GAGCTGTGCGGCGAGCGGGTTACCATT <u>AGC GAT TAC TGG</u> ATTCATTGGGTGCGTCAAGCTCCCG               | S30                               | D31 | Y32 | W33 |     |     |  |  |  |
|             | H101                                                                         | GAGCTGTGCGGCGAGCGGGTTACCATT RRY RRY THY THY ATTCATTGGGTGCGTCAAGCTCCCG                      | d                                 | d   | b   | b   |     |     |  |  |  |
|             | H102                                                                         | GAGCTGTGCGGCGAGCGGGTTACCATT RRY RRY THY KGG ATTCATTGGGTGCGTCAAGCTCCCG                      | d                                 | d   | b   | a   |     |     |  |  |  |
|             | H103                                                                         | GAGCTGTGCGGCGAGCGGGTTACCATT RRY RRY KGG THY ATTCATTGGGTGCGTCAAGCTCCCG                      | d                                 | d   | a   | b   |     |     |  |  |  |

|        |                                                                                  |                                                                                                                                             |     |     |     |      |      |       |       |     |     |     |  |  |
|--------|----------------------------------------------------------------------------------|---------------------------------------------------------------------------------------------------------------------------------------------|-----|-----|-----|------|------|-------|-------|-----|-----|-----|--|--|
| CDR-H2 | H104                                                                             | GAGCTGTGCGGCGAGCGGGTTACCATT RRY RRY KGG KGG ATTCATTGGGTGCGTCAAGCTCCCG                                                                       | d   | d   | a   | a    |      |       |       |     |     |     |  |  |
|        |                                                                                  | GCAAGGGGCTGGAGTGGGTCGCG <u>GGC</u> ATT <u>ACG</u> CCC <u>GCT</u> <u>GGC</u> GGT <u>TAC</u> ACA <u>TAT</u><br>TATGCCGACAGCGTAAAGGTCGCTTTACGA | G50 | I51 | T52 | P52A | A53  | G54   | G55   | Y56 | T57 | Y58 |  |  |
|        | H201                                                                             | GCAAGGGGCTGGAGTGGGTCGCG KGG ATT KGG CCC THY KGG GGT THY ACA THY<br>TATGCCGACAGCGTAAAGGTCGCTTTACGA                                           | a   | l   | a   | P    | b    | a     | G     | b   | T   | b   |  |  |
|        | H202                                                                             | GCAAGGGGCTGGAGTGGGTCGCG THY ATT KGG CCC THY KGG GGT THY ACA THY<br>TATGCCGACAGCGTAAAGGTCGCTTTACGA                                           | b   | l   | a   | P    | b    | a     | G     | b   | T   | b   |  |  |
| CDR-H3 |                                                                                  | AGCGGTGTATTATTGCGCGCTTTC <u>GTG</u> <u>TTT</u> <u>TTT</u> CTG <u>CCG</u> <u>TAT</u> <u>GCG</u> ATGGATTATTGGGGCAGGGCACCCTTG                  | V96 | F97 | F98 | L99  | P100 | Y100A | A100B |     |     |     |  |  |
|        | H301                                                                             | AGCGGTGTATTATTGCGCGCTTTC NWY NWY NWY NWY NWY KGG KGG ATGGATTATTGGGGCAGGGCACCCTTG                                                            | q   | q   | q   | q    | q    | a     | a     |     |     |     |  |  |
|        | H302                                                                             | AGCGGTGTATTATTGCGCGCTTTC NWY NWY NWY NWY KGG NWY KGG ATGGATTATTGGGGCAGGGCACCCTTG                                                            | q   | q   | q   | q    | a    | q     | a     |     |     |     |  |  |
|        | H303                                                                             | AGCGGTGTATTATTGCGCGCTTTC NWY NWY NWY KGG NWY NWY KGG ATGGATTATTGGGGCAGGGCACCCTTG                                                            | q   | q   | q   | a    | q    | q     | a     |     |     |     |  |  |
|        | H304                                                                             | AGCGGTGTATTATTGCGCGCTTTC NWY NWY KGG NWY NWY NWY KGG ATGGATTATTGGGGCAGGGCACCCTTG                                                            | q   | q   | a   | q    | q    | q     | a     |     |     |     |  |  |
|        | H305                                                                             | AGCGGTGTATTATTGCGCGCTTTC NWY KGG NWY NWY NWY NWY KGG ATGGATTATTGGGGCAGGGCACCCTTG                                                            | q   | a   | q   | q    | q    | q     | a     |     |     |     |  |  |
|        | H306                                                                             | AGCGGTGTATTATTGCGCGCTTTC KGG NWY NWY NWY NWY NWY KGG ATGGATTATTGGGGCAGGGCACCCTTG                                                            | a   | q   | q   | q    | q    | q     | a     |     |     |     |  |  |
|        | H307                                                                             | AGCGGTGTATTATTGCGCGCTTTC NWY NWY NWY NWY KGG KGG NWY ATGGATTATTGGGGCAGGGCACCCTTG                                                            | q   | q   | q   | q    | a    | a     | q     |     |     |     |  |  |
|        | H308                                                                             | AGCGGTGTATTATTGCGCGCTTTC NWY NWY NWY KGG NWY NWY NWY ATGGATTATTGGGGCAGGGCACCCTTG                                                            | q   | q   | q   | a    | q    | a     | q     |     |     |     |  |  |
|        | H309                                                                             | AGCGGTGTATTATTGCGCGCTTTC NWY NWY KGG NWY NWY NWY NWY ATGGATTATTGGGGCAGGGCACCCTTG                                                            | q   | q   | a   | q    | q    | a     | q     |     |     |     |  |  |
|        | H310                                                                             | AGCGGTGTATTATTGCGCGCTTTC NWY KGG NWY NWY NWY NWY NWY ATGGATTATTGGGGCAGGGCACCCTTG                                                            | q   | a   | q   | q    | q    | a     | q     |     |     |     |  |  |
|        | H311                                                                             | AGCGGTGTATTATTGCGCGCTTTC KGG NWY NWY NWY NWY KGG NWY ATGGATTATTGGGGCAGGGCACCCTTG                                                            | a   | q   | q   | q    | q    | a     | q     |     |     |     |  |  |
|        | H312                                                                             | AGCGGTGTATTATTGCGCGCTTTC NWY NWY NWY KGG KGG NWY NWY ATGGATTATTGGGGCAGGGCACCCTTG                                                            | q   | q   | q   | a    | a    | q     | q     |     |     |     |  |  |
|        | H313                                                                             | AGCGGTGTATTATTGCGCGCTTTC NWY NWY KGG NWY KGG NWY NWY ATGGATTATTGGGGCAGGGCACCCTTG                                                            | q   | q   | a   | q    | a    | q     | q     |     |     |     |  |  |
|        | H314                                                                             | AGCGGTGTATTATTGCGCGCTTTC NWY KGG NWY NWY KGG NWY NWY ATGGATTATTGGGGCAGGGCACCCTTG                                                            | q   | a   | q   | q    | a    | q     | q     |     |     |     |  |  |
|        | H315                                                                             | AGCGGTGTATTATTGCGCGCTTTC KGG NWY NWY NWY KGG NWY NWY ATGGATTATTGGGGCAGGGCACCCTTG                                                            | a   | q   | q   | q    | a    | q     | q     |     |     |     |  |  |
|        | H316                                                                             | AGCGGTGTATTATTGCGCGCTTTC NWY NWY KGG KGG NWY NWY NWY ATGGATTATTGGGGCAGGGCACCCTTG                                                            | q   | q   | a   | a    | q    | q     | q     |     |     |     |  |  |
|        | H317                                                                             | AGCGGTGTATTATTGCGCGCTTTC NWY KGG NWY KGG NWY NWY NWY ATGGATTATTGGGGCAGGGCACCCTTG                                                            | q   | a   | q   | a    | q    | q     | q     |     |     |     |  |  |
|        | H318                                                                             | AGCGGTGTATTATTGCGCGCTTTC KGG NWY NWY KGG NWY NWY NWY ATGGATTATTGGGGCAGGGCACCCTTG                                                            | a   | q   | q   | a    | q    | q     | q     |     |     |     |  |  |
|        | H319                                                                             | AGCGGTGTATTATTGCGCGCTTTC NWY KGG KGG NWY NWY NWY NWY ATGGATTATTGGGGCAGGGCACCCTTG                                                            | q   | a   | a   | q    | q    | q     | q     |     |     |     |  |  |
| H320   | AGCGGTGTATTATTGCGCGCTTTC KGG NWY KGG NWY NWY NWY NWY ATGGATTATTGGGGCAGGGCACCCTTG | a                                                                                                                                           | q   | a   | q   | q    | q    | q     |       |     |     |     |  |  |
| H321   | AGCGGTGTATTATTGCGCGCTTTC KGG KGG NWY NWY NWY NWY NWY ATGGATTATTGGGGCAGGGCACCCTTG | a                                                                                                                                           | a   | q   | q   | q    | q    | q     |       |     |     |     |  |  |

<sup>1</sup> Codons for mutagenized residues at CDR regions are underlined; DNA degeneracies are represented by IUB code (N = A/T/G/C, H = A/C/T, V = A/C/G, K = G/T, R = A/G, S = G/C, W = A/T, and Y = C/T).

<sup>2</sup> Residues are in Kabat number. Symbols used: a, W/G; b, F/S/Y; d, G/D/S/N; e, G/A/S/T/R/P; p, A/T/P/S; q, F/Y/D/V/N/I/H/L; z, L/I/V/F/M.



**Supplementary Table S4. Related to Figure 5c.** Summary of the expression and characterization GH2 and mouse IgGs: epitope group, expression yield, EC<sub>50</sub>, and BIAcore measurement of binding kinetics and affinity.

| Antibody<br>Leads | Epitope<br>Group | Yield<br>(mg/L) | EC <sub>50</sub><br>(ng/mL) | BIAcore assay                               |                              |                         |
|-------------------|------------------|-----------------|-----------------------------|---------------------------------------------|------------------------------|-------------------------|
|                   |                  |                 |                             | $k_{on}$ (M <sup>-1</sup> S <sup>-1</sup> ) | $k_{off}$ (S <sup>-1</sup> ) | K <sub>D</sub> (M)      |
| GH2-3             | M63-M64          | 8.0             | 7.0                         | $2.425 \times 10^5$                         | $5.024 \times 10^{-4}$       | $2.071 \times 10^{-9}$  |
| GH2-7             | M32-M62          | 11.0            | 3.3                         | $6.179 \times 10^6$                         | $6.082 \times 10^{-2}$       | $9.842 \times 10^{-9}$  |
| GH2-8             | M32-M62          | 9.3             | 5.1                         | $5.988 \times 10^5$                         | $1.551 \times 10^{-4}$       | $2.590 \times 10^{-10}$ |
| GH2-13            | M32-M62          | 7.7             | 3.0                         | $3.103 \times 10^6$                         | $8.179 \times 10^{-3}$       | $2.636 \times 10^{-9}$  |
| GH2-14            | M32-M62          | 41.1            | 9.2                         | $3.365 \times 10^5$                         | $5.735 \times 10^{-3}$       | $1.704 \times 10^{-8}$  |
| GH2-16            | Ungroup          | 18.8            | 4.2                         | $8.571 \times 10^4$                         | $1.025 \times 10^{-4}$       | $1.196 \times 10^{-9}$  |
| GH2-18            | Ungroup          | 13.8            | 3.3                         | $1.563 \times 10^5$                         | $1.086 \times 10^{-5}$       | $6.948 \times 10^{-11}$ |
| GH2-21            | M41-M61          | 15.8            | 4.1                         | $4.435 \times 10^5$                         | $6.228 \times 10^{-4}$       | $1.404 \times 10^{-9}$  |
| GH2-23            | M41-M61          | 11.0            | 4.5                         | $2.174 \times 10^5$                         | $1.797 \times 10^{-4}$       | $8.266 \times 10^{-10}$ |
| GH2-36            | M32-M62          | 10.1            | 3.9                         | $8.681 \times 10^8$                         | 7.7                          | $8.852 \times 10^{-9}$  |
| GH2-40            | M32-M62          | 8.7             | 4.0                         | $7.118 \times 10^4$                         | $2.165 \times 10^{-4}$       | $3.042 \times 10^{-9}$  |
| GH2-42            | M32-M62          | 19.3            | 2.7                         | $1.393 \times 10^6$                         | $2.354 \times 10^{-4}$       | $1.690 \times 10^{-10}$ |
| GH2-54            | M32-M62          | 27.0            | 8.0                         | $3.387 \times 10^5$                         | $1.282 \times 10^{-2}$       | $3.785 \times 10^{-8}$  |
| GH2-59            | M32-M62          | 5.8             | 31.2                        | $4.778 \times 10^4$                         | $2.877 \times 10^{-4}$       | $6.022 \times 10^{-9}$  |
| GH2-60            | M32-M62          | 15.8            | 3.4                         | $3.636 \times 10^6$                         | $5.557 \times 10^{-3}$       | $1.529 \times 10^{-9}$  |
| GH2-61            | M32-M62          | 10.0            | 3.5                         | $3.866 \times 10^5$                         | $1.044 \times 10^{-4}$       | $2.700 \times 10^{-10}$ |
| GH2-65            | M32-M62          | 6.8             | 7.6                         | $3.497 \times 10^5$                         | $1.110 \times 10^{-2}$       | $3.175 \times 10^{-8}$  |
| GH2-66            | M32-M62          | 12.3            | 7.9                         | $6.026 \times 10^6$                         | $3.284 \times 10^{-1}$       | $5.453 \times 10^{-8}$  |
| GH2-72            | M32-M62          | 12.6            | 13.7                        | $9.152 \times 10^8$                         | 10.89                        | $1.189 \times 10^{-8}$  |
| GH2-75            | M32-M62          | 18.3            | 2.2                         | $8.399 \times 10^5$                         | $1.486 \times 10^{-4}$       | $1.769 \times 10^{-10}$ |
| GH2-78            | M32-M62          | 12.1            | 24.4                        | $3.302 \times 10^4$                         | $1.632 \times 10^{-3}$       | $4.942 \times 10^{-8}$  |
| GH2-81            | M32-M62          | 28.1            | 5.0                         | $9.750 \times 10^5$                         | $1.309 \times 10^{-2}$       | $1.343 \times 10^{-8}$  |
| GH2-87            | M63-M64          | 40.2            | 14.7                        | $3.948 \times 10^5$                         | $5.248 \times 10^{-3}$       | $1.329 \times 10^{-8}$  |
| GH2-91            | M32-M62          | 14.2            | 4.2                         | $2.747 \times 10^6$                         | $6.790 \times 10^{-3}$       | $2.472 \times 10^{-9}$  |
| GH2-95            | M32-M62          | 29.8            | 3.2                         | $5.466 \times 10^4$                         | $2.441 \times 10^{-4}$       | $4.466 \times 10^{-9}$  |
| GH2-96            | M32-M62          | 20.1            | 3.4                         | $2.537 \times 10^5$                         | $1.375 \times 10^{-3}$       | $5.422 \times 10^{-9}$  |
| GH2-98            | M32-M62          | 29.7            | 82.3                        | $2.536 \times 10^5$                         | $2.243 \times 10^{-2}$       | $8.847 \times 10^{-8}$  |
| GH2-102           | M32-M62          | 8.1             | 23.1                        | $1.371 \times 10^6$                         | $3.902 \times 10^{-2}$       | $2.845 \times 10^{-8}$  |
| GH2-104           | M32-M62          | 41.7            | 2.8                         | $8.515 \times 10^5$                         | $8.841 \times 10^{-4}$       | $1.035 \times 10^{-9}$  |
| M32               | M32-M62          | 6.8             | 3.1                         | $2.941 \times 10^5$                         | $7.147 \times 10^{-5}$       | $2.430 \times 10^{-10}$ |
| M41               | M41-M61          | 13.8            | 3.4                         | $6.708 \times 10^5$                         | $3.481 \times 10^{-5}$       | $5.189 \times 10^{-11}$ |
| M61               | M41-M61          | 21.3            | 3.5                         | $4.060 \times 10^6$                         | $2.401 \times 10^{-3}$       | $5.912 \times 10^{-10}$ |
| M62               | M32-M62          | 5.4             | 2.0                         | $7.883 \times 10^5$                         | $1.799 \times 10^{-5}$       | $2.282 \times 10^{-11}$ |
| M63               | M63-M64          | 10.2            | 2.4                         | $6.155 \times 10^5$                         | $7.339 \times 10^{-5}$       | $1.192 \times 10^{-11}$ |
| M64               | M63-M64          | 12.8            | 3.1                         | $1.735 \times 10^6$                         | $3.374 \times 10^{-4}$       | $1.945 \times 10^{-10}$ |
| Trastuzumab       | Ungroup          | —               | 4.5                         | $2.543 \times 10^6$                         | $2.157 \times 10^{-5}$       | $8.482 \times 10^{-12}$ |

**Supplementary Table S5. Related to Figure 5c.** Summary of the CDR sequences of GH2 and mouse IgGs. The range of the CDR residues are shown on the first row in Kabat number.

| CDR<br>Seq range | CDR-L1<br>(L30~L32) | CDR-L2<br>(L49~L53) | CDR-L3<br>(L91~L96) | CDR-H1<br>(H30~H33) | CDR-H2<br>(H50~H58) | CDR-H3<br>(H96~H100B) |
|------------------|---------------------|---------------------|---------------------|---------------------|---------------------|-----------------------|
| GH2-3            | NNN                 | YGARY               | FGGGPL              | SGGW                | GIWPSGGSTS          | YFGFGDL               |
| GH2-7            | SGW                 | SGTAG               | YYDFPV              | DDYF                | GIGPSWGYTF          | GHNFVNG               |
| GH2-8            | GWW                 | SGATG               | SWDSP1              | GSSG                | GIWPYWGSTY          | GVGYHYH               |
| GH2-13           | YFG                 | SGTTS               | YGSYPI              | SDGG                | GIWPYWGYS           | DNNWVGN               |
| GH2-14           | GGG                 | SGPPY               | YFNYP1              | NDHG                | GIGPFGGYTS          | NFNDVGG               |
| GH2-16           | YSS                 | SYTSY               | YYGGPM              | NNWG                | GIWPFGGYTY          | DYLNNGG               |
| GH2-18           | NSN                 | YWTTG               | YLSGPI              | SNWG                | GIWPYGGYTF          | NYLNLGG               |
| GH2-21           | SDN                 | YWATG               | YYGFPL              | NDYS                | SIWPFGGSTS          | NYWIGII               |
| GH2-23           | FWG                 | SWSAS               | YFSFPF              | NGGG                | FIGPFGGSTF          | FGGNIHV               |
| GH2-36           | NSN                 | YFSSG               | YYNWPL              | GGGG                | YIGPYGGYTS          | HDHIGGI               |
| GH2-40           | NNG                 | SGTPW               | YFDWPL              | NSWG                | WIGPYWGFTS          | DGHFDGV               |
| GH2-42           | SSG                 | SGPTG               | YYDWPL              | SNWG                | GIGPYGGYTS          | GFYFDGI               |
| GH2-54           | NDN                 | FGSSS               | GWNYPF              | SDGS                | FIGPYWGFTY          | VNWWHYG               |
| GH2-59           | SGG                 | SWTGS               | WSDFP1              | GDWY                | GIGPYWGYS           | VGDVWHD               |
| GH2-60           | GSW                 | SSPPS               | GFDSP1              | SDFG                | GIWPYWGYS           | WNIYWNV               |
| GH2-61           | GSN                 | SWSTS               | YGGWPI              | NNWG                | GIWPYGGYTY          | YNHHGGV               |
| GH2-65           | SGW                 | SSASF               | YYDFPV              | DDWG                | WIWPYWGYS           | LDWNNNW               |
| GH2-66           | YSY                 | SYASG               | YYNSPI              | GNWG                | YIWPYWGFTY          | LDWLLW                |
| GH2-72           | GYF                 | SGTTW               | YSNWPL              | SNGG                | YIWPSSGYTF          | FNNDWIG               |
| GH2-75           | SGY                 | YS---               | YYNWPV              | GNSG                | YIGPYGGYTS          | DDYHWDG               |
| GH2-78           | NNS                 | SWPTG               | YYSWPI              | NNWG                | GIGPYGGYTS          | GVIIDGI               |
| GH2-81           | NDG                 | SFTTG               | YYNWPI              | NDYG                | GIGPFGGYTS          | GVLFDGV               |
| GH2-87           | NNS                 | FGTRY               | YYNYPL              | SSYG                | GIGPFGGFTS          | LNIHLGW               |
| GH2-91           | GWG                 | SWPTY               | YFSYPI              | NNFG                | SIGPFWGYTS          | GNDYDGV               |
| GH2-95           | SGG                 | FGSTW               | YYDWPL              | DSWG                | GIGPFWGYTS          | GIHFDGI               |
| GH2-96           | NGG                 | YGSSW               | YFDWPI              | SGYG                | GIGPFWGYTF          | GHIVDGL               |
| GH2-98           | GSG                 | YFSAS               | YYNWPL              | NNYG                | GIGPSWGFTY          | GFYNDGF               |
| GH2-102          | GSN                 | YGAPY               | YYNWPL              | NGGG                | SIGPYGGYTS          | GHHYDGH               |
| GH2-104          | NSN                 | YGSPS               | YYDWPL              | DSWG                | GIGPFGGYTS          | GDYIDGV               |
| M32              | GTA                 | YSASN               | YSSYPL              | KDYF                | WIDPENGNTI          | YYGSRVL               |
| M41              | SNY                 | YYTSG               | VNTLPY              | TTYP                | NFHYPYNDYTN         | HDGYYGA               |
| M61              | YSY                 | YNAKT               | HYGTPY              | TTYP                | NFHYPYNDTK          | NDGYYGA               |
| M62              | GTN                 | HSASY               | YNSYPL              | IDYY                | EIYPGGPNPY          | YKYDVS                |
| M63              | SNY                 | GGTKN               | WYSNHW              | SDYA                | VISIYYDNIN          | GF                    |
| M64              | STA                 | YWAST               | HYSTPY              | KNTY                | RIDPANGNTK          | YRGAM                 |
| Trastuzumab      | NTA                 | YSASF               | HYTPP               | KDYY                | RIYPTNGYTR          | GGDGFYA               |

**Supplementary Table S6. Related to Results.** Summary of antibody discoveries of GH2 scFvs binding specifically to the protein antigens listed in the first column.

| Antigens                                            | Analyzed clones <sup>a</sup> | Unique clones <sup>b</sup> |
|-----------------------------------------------------|------------------------------|----------------------------|
| Maltose-binding protein                             | 236/494                      | 18/55                      |
| Bovine serum albumin                                | 337/486                      | 44/86                      |
| Human serum albumin                                 | 51/72                        | 2/8                        |
| Lysozyme                                            | 139/430                      | 15/42                      |
| RNase A                                             | 0/424                        | 0                          |
| Interleukin-1 beta                                  | 2/288                        | 1/2                        |
| Human DNase I                                       | 0/412                        | 0                          |
| Hemagglutinin of A/California/7/2009(H1N1)          | 709/1727                     | 91/454                     |
| Hemagglutinin of A/Brisbane/10/2007(H3N2)           | 155/314                      | 57/148                     |
| Vascular endothelial growth factor                  | 414/1088                     | 31/114                     |
| Epidermal growth factor receptor 1/ECD <sup>c</sup> | 85/96                        | 5/72                       |
| Epidermal growth factor receptor 3/ECD              | 70/96                        | 20/70                      |
| Glucagon receptor/ECD                               | 400/768                      | 137/321                    |
| Rituximab                                           | 39/72                        | 21/37                      |

<sup>a</sup>The ratio indicates the positive clones over the total analyzed single colonies for the corresponding antigen.

<sup>b</sup>The ratio indicates the sequence-wise unique clones over the total sequenced positive clones.

<sup>c</sup>ECD, the receptor's extracellular domain.

## **Supplemental Experimental Procedures**

### ***Mouse immunization***

Female BalbC/j for immunization were bred and kept under approved SPF conditions (preapproved by the Institutional Animal Care and Use Committee of Academia Sinica protocol ID: IACUC\_13-03-545). At 8~12 weeks of age, immunizations were carried out by giving the immunogen to inguinal lymph node. Half of the total dose (20 $\mu$ L) of immunogen was injected to each flank of inguinal lymph node after anesthetized with ketamine. Immunogen was prepared by emulsifying the immunogen solution with TiterMax (1:1 volume). To monitor the immune response, titers of antibodies against HER2/ECD in serum were monitored by ELISA and western blotting. Second booster immunization was received 4 weeks after first immunization with substantial titer climbing rate. When serum titer staying the stationary phase (hyper-immunization response), the mouse was sacrificed and spleen was harvested for NGS and phage display of the antibody repertoire.

### ***NGS of phage-displayed antibody libraries***

DNA samples for next generation sequencing were prepared by PCR amplifications using primers flanking the VH or the VL variable domain sequences harbored by phagemids from the phage display libraries. The purified DNA fragments were sequenced with Roche 454 GS junior sequencer according to the titanium sequencing protocol.

### ***Computational analysis of the NGS data***

The raw reads for the VH and VL variable domain sequences from naïve and immunized mice were collected separately from NGS. These reads were first

processed by Antibodyomics 1.0 package <sup>2</sup> for sequence length filtering, amino acid translation and germline gene assignment. The definition of both human and mouse germline genes and corresponding germline sequences were downloaded from IMGT web site<sup>3</sup>. For each antibody sequence, the complementarity determining regions (CDRs) were defined by aligning the query sequence to the established heavy chain-specific or light chain-specific hidden Markov models (HMM) derived from 357 antibody structures<sup>4</sup>. The sequence Logos for each CDRs were created by WebLogo<sup>5</sup> using the default background probabilities and parameters. The phylogenetic analysis of heavy chain and light chain variable domain sequences was performed respectively with the MEGA program<sup>6</sup> for phylogenetic tree building with the neighbor-joining method. The assignments of canonical structure of CDRs were performed by the abYsis web server (<http://www.bioinf.org.uk/abysis/>). The NGS data analysis indicated that about two thirds of heavy and light chain variable domain sequences contained at least one residue deviation from the corresponding germline sequence (Supplementary Table S1). The sequence deviations could result from SHM or NGS error. CS assignment by the abYsis web server indicated that less than 1% of these sequences had CS assignment different from that of their corresponding germline sequence, indicating that the CSs of the variable domain sequences are conserved in SHM and are relatively insensitive to the sequencing errors of NGS (Supplementary Table S1).

### ***Competition of antibody-HER2/ECD interaction***

To investigate the binding epitops of selected anti-HER2 scFvs, we used a modified phage ELISA to detect the competition of the scFvs binding to HER2/ECD with a panel of purified anti-HER2 scFvs or IgGs. Test phages were produced from individual clones grown in a 96-well format. The HER2/ECD antigen (0.2 µg per well)

were coated in PBS buffer (pH7.4) on NUNC 96-well Maxisorb immunoplates overnight at 4 °C, and blocked with 5% skim milk in PBST for 1h. After blocking, 1~3 µg purified anti-HER2 scFv or IgG were added to each well for 30 min under gentle shaking and then added 50 µL test phage for another hour incubation. The plate was washed 6 times with 300 µL PBST [0.05% (v/v) Tween 20] and incubated 30 min with horse-radish peroxidase/anti-M13 antibody conjugate (1 : 2000 dilution ) and horse-radish peroxidase/anti-E-tag antibody conjugate (1 : 3000 dilution ). The plates were washed six times with PBST buffer and twice with PBS, developed for 5 min with 3,3',5,5'-tetramethyl-benzidine peroxidase substrate (Kirkegaard & Perry Laboratories), quenched with 1.0 M HCl and read spectrophotometrically at 450 nm. Competition values were calculated by comparing each control sample without adding anti-HER2 scFvs or IgGs. For competition analysis, the gplots package of R software (<http://www.r-project.org/>) was used for generating the heat map with a dendrogram for the competition data where the competition values were normalized from 0 to 100.

***Antibody-antigen interaction affinity and kinetics measurements by surface plasmon resonance***

BIAcore T200 (GE Healthcare) instrument was used to determine the binding affinities and kinetic parameters for interactions between IgGs and HER2/ECD. HER2/ECD in 10 mM acetate buffer (pH 5.0) was immobilized on a CM5 sensor chip to a response unit (RU) of 1000 with an amine coupling kit. Association ( $k_{on}$ ) and dissociation ( $k_{off}$ ) constants of the interactions between IgGs and HER2/ECD were measured in PBST running buffer (0.05% Tween 20) with a flow rate of 30 µL/min. The sensor surface was regenerated with 10 mM Glycine, pH 1.5, prior to a new IgG injection and the signals obtained were subtracted by that obtained from the reference channel that had not been coated with ligands. Binding kinetics was determined by

global fitting to 1:1 binding model using the Biaevaluation software (GE Healthcare).

***Epitope mapping with hydrogen-deuterium exchange measured with LC-tandem mass spectroscopy (HDX-MS)***

For HDX-MS epitope mapping, deuterated antigen-antibody complex, deuterated antigen and non-deuterated antigen were prepared. In deuterated antigen-antibody complex preparation, antigen-antibody complex in 1:2 molar ratio was initially prepared by mixing 1.1 mg/mL of HER2/ECD with 6 mg/mL of antibody and incubation at room temperature for 1 hr. The proteins was deglycaned by incubating the samples with 2 µg deglycan enzyme-PNGase (P0704S, NEB) at 37 °C for 2 hr so as to increase the sequence coverage determined by mass spectrometry. Deuteration of the sample was carried out by mixing 5 µL of antigen or antigen-antibody complex with 20 µL of deuteration buffer (100 % D<sub>2</sub>O, 10 mM TRIS, 140 mM NaCl, pD 7.2) followed by a 10 min exchange incubation at room temperature. The exchange reaction was quenched by addition of 75 µL of ice pre-chilling quench solution (0.15 % formic acid, 8 M urea, 1 M TCEP, pH 2.5) and reduced the sample volume to 20 µL using centrifugal concentrator (Vivaspin 500, 10 kDa, GE Healthcare) with 7500 rpm at 0 °C. Denatured sample was diluted by addition of 40 µL pre-chilling acid solution (0.15 % formic acid, 100 mM TCEP, pH 2.5) for reducing urea concentration, and then double digested by incubating the sample with 3 µL of pepsin (5 mg/mL) and 3 µL of protease type XIII (50 mg/mL) on ice for 30 min. Digested sample was immediately frozen by liquid nitrogen and stored at -80 °C. Non-deuterated antigen was prepared without the deuteration step.

For peptide mass determination, the samples were thawed rapidly and then immediately injected a volume of 10 µL into a tandem liquid chromatographic system (Accela pump, Thermo Scientific) coupled with ESI mass spectrometry (Velos Pro

LTQ, Thermo Scientific) for separation and analyses. The separation was carried out using a C<sub>18</sub> column (XBridge C<sub>18</sub>, 3.5 μm, 1.0 x 150 mm, Waters) with a linear gradient from 10 % to 60 % solvent B (solvent A: water, 0.15 % formic acid; solvent B: acetonitrile, 0.1 % formic acid) for 30 min at a flow rate of 50 μL /min. The C<sub>18</sub> column, injector and tube were submerged in an ice bath for reducing back-exchange. Mass spectra were collected in resolution mode (m/z 300–2,000) from a mass spectrometer equipped with a standard electrospray ionization source. The centroid value of each peptide isotopic envelope was measured using HX-Express 2<sup>7</sup>. The deuteration level of each peptide fragment from the antigen was determined by Equation (1):

$$\text{Deuteration Level (\%)} = 100 - 100 \times [m(P) - m(N)]/[m(F) - m(N)] \quad (1)$$

where m(P), m(N), and m(F) are the centroid values for a given deuterated antigen-antibody complex, non-deuterated antigen, and deuterated antigen, respectively. Only changes in deuteration level greater than 10 % are considered to be the binding site.

### ***EC<sub>50</sub> for antibody-antigen interactions***

The IgG EC<sub>50</sub> was determined by the titrations of IgG antibodies on immobilized HER2/ECD with ELISA. In brief, the HER2/ECD antigen (0.2 μg per well) were coated in PBS buffer (pH7.4) on NUNC 96-well Maxisorb immunoplates overnight at 4 °C, and blocked with 5% skim milk in PBST [0.05% (v/v) Tween 20] for 1h. In the meantime, IgGs in PBST with 5% milk were prepared at 11 concentration by twofold serial dilutions. After blocking, 100 μL diluted IgG samples were added to each well, and incubated for 1h under gentle shaking. The plate was washed 6 times with 300 μL PBST and then added with 100 μL 1 : 2000-diluted horse-radish peroxidase/anti-human IgG antibody conjugate in PBST with 5% milk for 1h incubation. The plates were washed six times with PBST buffer and twice with



PBS, developed for 3 min with 3,3',5,5'-tetramethyl-benzidine peroxidase substrate (Kirkegaard & Perry Laboratories), quenched with 1.0 M HCl and read spectrophotometrically at 450 nm. The EC<sub>50</sub> (ng/mL) was calculated according to Stewart and Watson method<sup>8</sup>.

### ***Transient expression of IgG with HEK293-F cells***

*Convert scFv to IgG format:* For IgG expression, the variable domains of light chain (VL) and heavy chain (VH) cDNAs were amplified from the scFv plasmids of binder phages by PCR and then cloned into mammalian expression vector pIgG (a gift from Dr. Tse-Wen Chang, Genomics Research Center of Academia Sinica). The VL domain cDNA was amplified by PCR with proof-reading DNA polymerase (KOD Hot Start DNA polymerase, Novagen) using primer set GH2-VL-F-KpnI (CAGGTGCACGATGTGATGGTACCGATATTCAAAT GACCCAGAGCCCGAGCAGCCTGAGC) with GH2-VL-R (TGCAGCCACCGTACGTTTGATTTCACCTGGGTGCC); for VH domain, using GH2-VH-F (CGTGTCGCATCTGAAGTGCAGCTGGTGGGAATCGGGA) with GH2-VH-R-NheI (GACCGATGGGCCCTTGGTGCTAGCCGAGCTCACGGTAACAAGGGTGCC).

The italic letter of primers indicated the restriction enzyme sites. PCR reactions were performed in a volume of 50 µL with 100 ng DNA template and 1 µL of 10 µM of each primer for 30 cycles (30 sec for 95°C, 30 sec for 56°C, 30 sec for 72°C) followed a 10 min final synthesis step at 72°C. The PCR products were extracted from 1.0 % agarose electrophoresis gel. The linker DNA fragment between V<sub>L</sub> and V<sub>H</sub> domains was obtained from pIgG vector by PCR amplification as above, using primer set GH2-IgG-linker-F

(AAGGTGGAAATCAAACGTACGGTGGCTGCACCATCTGTC) and GH2-IgG-

linker-R (CTGCACTTCAGATGCGACACGCGTAGCAACAGC). The linker fragment includes the constant domain of light chain, bovine growth hormone (BGH) polyA signal, and human cytomegalovirus (CMV) promoter followed by the signal peptide of IgG heavy chain. The above three DNA fragments (VL domain, linker, and VH domain) were assembled by PCR amplification using primer set GH2-VL-F-KpnI and GH2-VH-R-NheI for 30 cycles (30 sec for 95°C, 30 sec for 58°C, 90 sec for 72°C). The PCR products were extracted from 1 % agarose electrophoresis gel and cloned into pIgG vector by Gibson assembly methods<sup>9</sup>. In brief, 2 µL (20 ng) of linearized pIgG vector (digested by *KpnI* and *NheI* previously) and 2 µL (20 ng) insert DNA were mixed with 4 µL Gibson Assembly Master Mix (New England BioLabs Inc. Ipswich, MA, USA) and incubated at 50°C for 1 hour. After then, half volume of ligation mixture was transformed with *Escherichia coli* JM109 competent cells. The DNA insertion of plasmid was confirmed by restriction enzyme digestion and nucleotide sequencing. The constructed vector contains both light chain and heavy chain of IgG, controlled by human cytomegalovirus (CMV) promoter separately.

*Transfection of HEK293 F cells and IgG expression:* Suspension HEK293 Freestyle (293-F, Life Technologies, USA) cells were grown in serum free Freestyle 293 expression media (Life Technologies) at 37°C shaken with 110 rpm in 7% CO<sub>2</sub> incubator (Thermo Scientific). For 500 mL culture transfection, suspension 293-F cells in 2-L Erlenmeyer flasks were adjusted to the density of 1.0 x 10<sup>6</sup> cells/mL. The plasmid DNA (500 µg), diluted in 25 mL serum free medium and sterile with 0.2 µm syringe filter, was mixed vigorously with 25 mL medium containing 1 mg of cationic polymer polyethylenimine (PEI, Polysciences). After 20 min incubation at room temperature, the mixture was added dropwise to the cells with slight shaking, and then the cells were grown in reach-in incubator at 37°C. Tryptone N1 (ST Bio, Inc, Taipei, Taiwan) was added to a final concentration of 0.5% at 24 hr of post-transfection. After

5 days culture, the supernatant was collected by centrifugation at 8000 x g for 30 min and filtered with 0.8 µm membrane filter (Pall Corporation, Michigan). The supernatant was loaded on HiTrap Protein A affinity column (GE Healthcare, Uppsala, Sweden), and eluted with 0.2 N glycine-HCl at pH 2.50 into 1/10 volume of 1 M Tris-HCl buffer at pH 9.1. The IgG proteins were further purified with Superdex 200 gel filtration column (10/300 GL, GE Healthcare, Uppsala, Sweden) to remove high molecular weight aggregates.

### ***Cell line and reagents***

SKBR3 cells were obtained from the American Type Culture Collection (ATCC) and grown in RPMI 1640 (Gibco) with 10% fetal bovine serum and antibiotics/antimycotics. Heregulin (HRG) was purchased from R&D systems. Antibodies of phospho-ERK, ERK, phospho-AKT and AKT used in Western blotting were obtained from Cell Signaling Technology; rabbit anti-HER2 and anti-Tubulin antibody was from Sigma.

### ***Immunofluorescence microscopy***

SKBR3 cells seeded in Lab-Tek II chamber slides (Nunc) were allowed to grow for overnight and were treated with IgGs for the indicated time at 37°C before fixation by methanol. Fixed cells were permeabilized by TBS-Tx (TBS with 0.1% triton X-100) and blocked in blocking buffer (2% BSA in TBS-Tx) for 10 minutes at room temperature. Where indicated, cells were incubated with primary antibody in blocking buffer at 4°C overnight, washed, incubated with secondary antibodies (Alexa-488-conjugated goat anti-rabbit; Invitrogen and Alexa-647-conjugated goat anti-human) in blocking buffer for 60 minutes at room temperature, washed, and mounted with mounting medium with DAPI (Life Technologies). Slides were

examined using a TCS-SP5-MP-SMD confocal microscope (Leica) equipped with 40 × and 100 × apochromat objectives. Alexa fluorophores were excited at 488 nm and 647 nm by Argon and NeHe laser respectively. Images were processed using the LAS AF Software software (Leica).

### ***Western blotting***

Cell lysates from antibody-treated or parental cells were subjected to SDS-PAGE, transferred to PVDF membranes. These blots were blocked with 5% nonfat milk powder in TBS-0.1% Tween-20 for 30 minutes, followed by incubation with primary antibodies at 4°C overnight and then horseradish peroxidase-conjugated secondary antibodies (Amersham Biosciences, Piscataway). Imaging of bands was performed using Pierce ECL Western Blotting Substrate (Thermo Fisher Scientific) and ImageQuant LAS-4000 (GE Healthcare).

### **Supplemental References**

1. Chothia, C. et al. Conformations of immunoglobulin hypervariable regions. *Nature* **342**, 877-883 (1989).
2. Zhu, J. et al. De novo identification of VRC01 class HIV-1-neutralizing antibodies by next-generation sequencing of B-cell transcripts. *Proceedings of the National Academy of Sciences of the United States of America* **110**, E4088-4097 (2013).
3. Lefranc, M.P. et al. IMGT, the international ImMunoGeneTics information system. *Nucleic acids research* **37**, D1006-1012 (2009).
4. Peng, H.P., Lee, K.H., Jian, J.W. & Yang, A.S. Origins of specificity and affinity in antibody-protein interactions. *Proc Natl Acad Sci U S A* **111**, E2656-2665 (2014).
5. Crooks, G.E., Hon, G., Chandonia, J.M. & Brenner, S.E. WebLogo: a sequence logo generator. *Genome research* **14**, 1188-1190 (2004).
6. Tamura, K., Stecher, G., Peterson, D., Filipski, A. & Kumar, S. MEGA6: Molecular Evolutionary Genetics Analysis version 6.0. *Molecular biology and evolution* **30**, 2725-2729 (2013).

7. Guttman, M., Weis, D.D., Engen, J.R. & Lee, K.K. Analysis of overlapped and noisy hydrogen/deuterium exchange mass spectra. *J Am Soc Mass Spectrom* **24**, 1906-1912 (2013).
8. Stewart, M.J. & Watson, I.D. Standard units for expressing drug concentrations in biological fluids. *British journal of clinical pharmacology* **16**, 3-7 (1983).
9. Gibson, D.G. et al. Enzymatic assembly of DNA molecules up to several hundred kilobases. *Nat Methods* **6**, 343-345 (2009).
